# Supplementary material
Source: Springer Nature journal article supplement (https://www.springermedizin.de/resource/supplementary/13023_2009_193_MOESM11_ESM.pdf/9641832)

●  $\frac{E}{A}$   
+ v 0.07 m/s  
p 0.02 mmHg

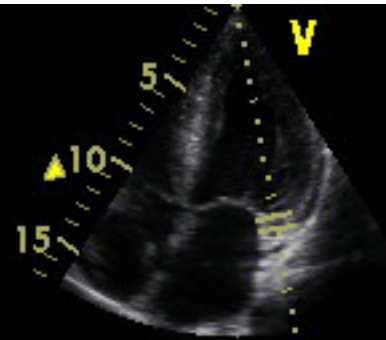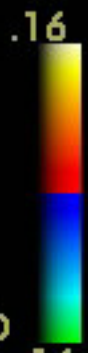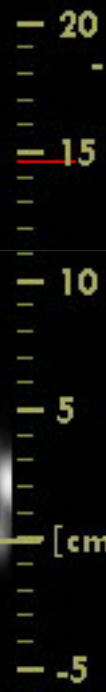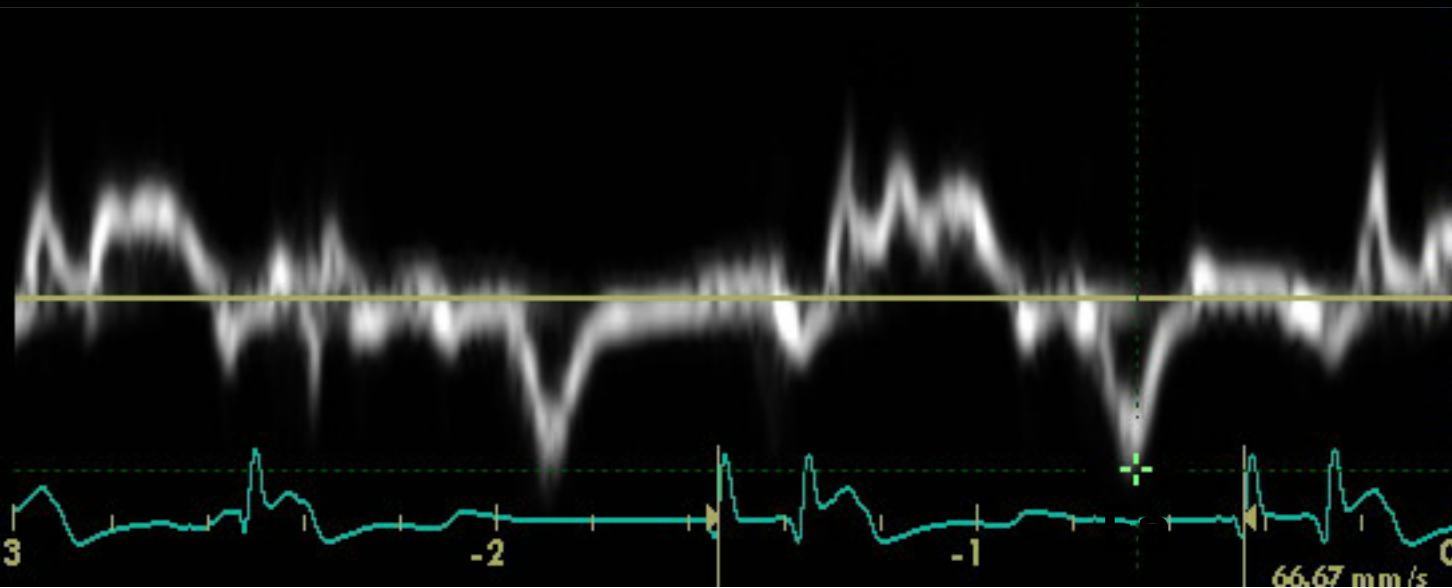

-3 -2 -1 0 66.67 mm/s 62 HR

Supplement: MOESM11 [file 9641832]
